# Supplementary material for: Evaluation of the “Eat Better Feel Better” Cooking Programme to Tackle Barriers to Healthy Eating
Source: MDPI journal article supplement (doi:10.3390/ijerph14040380), 2017-04-04
Supplement: s1 [file s1]

*Supplementary Table 1. Median values for food preparation, cooking and eating practices at baseline and post-intervention stratified by attendance.*

| Cooking and Eating Practices                                    | All participants <sup>1</sup>                  |                      |         | Attendance 3-4 sessions <sup>2</sup> |                      |         | Attendance 5-6 sessions <sup>3</sup> |                      |         |
|-----------------------------------------------------------------|------------------------------------------------|----------------------|---------|--------------------------------------|----------------------|---------|--------------------------------------|----------------------|---------|
|                                                                 | Pre                                            | Post                 | P value | Pre                                  | Post                 | P value | Pre                                  | Post                 | P value |
|                                                                 | Median <sup>4</sup><br>(P25, P75) <sup>5</sup> | Median<br>(P25, P75) |         | Median<br>(P25, P75)                 | Median<br>(P25, P75) |         | Median<br>(P25, P75)                 | Median<br>(P25, P75) |         |
| I think about how I can save time when cooking                  | 3 (2, 4)                                       | 3 (2, 4)             | 0.105   | 3 (2, 3)                             | 3 (2, 4)             | 0.248   | 3 (2, 4)                             | 3 (3, 4)             | 0.224   |
| I think it is time consuming using raw ingredients when cooking | 3 (2, 4)                                       | 3 (2, 3)             | 0.105   | 3 (2, 3)                             | 2 (2, 2)             | 0.034*  | 3 (2, 4)                             | 2 (1, 3)             | 0.249   |
| I plan what to cook before shopping                             | 3 (2, 3)                                       | 3 (2, 4)             | 0.068   | 3 (2, 4)                             | 3 (1, 4)             | 0.705   | 3 (2, 4)                             | 4 (3, 4)             | 0.006*  |
| I look for special offers on food when I shop                   | 4 (3, 5)                                       | 4 (3, 5)             | 0.619   | 4 (3, 4)                             | 4 (2, 4)             | 0.558   | 5 (4, 5)                             | 4 (3, 5)             | 0.322   |
| I cook in bulk                                                  | 2 (1, 3)                                       | 3 (1, 3)             | 0.039*  | 1 (1, 2)                             | 3 (1, 3)             | 0.039*  | 3 (1, 3)                             | 3 (2, 3)             | 0.191   |
| I throw away leftover food                                      | 3 (2, 4)                                       | 3 (2, 4)             | 0.394   | 4 (4, 5)                             | 4 (3, 4)             | 0.157   | 3 (2, 4)                             | 3 (2, 4)             | 0.346   |
| I eat breakfast                                                 | 4 (3, 5)                                       | 5 (3, 5)             | 0.156   | 4 (1, 5)                             | 5 (2, 5)             | 0.102   | 4 (3, 5)                             | 5 (3, 5)             | 0.253   |
| I have snacks in between meals                                  | 3 (3, 4)                                       | 3 (2, 4)             | 0.226   | 4 (3, 5)                             | 3 (2, 5)             | 0.046   | 3 (3, 4)                             | 3 (2, 4)             | 0.253   |
| I eat meals at regular times                                    | 4 (3, 5)                                       | 4 (3, 5)             | 0.284   | 3 (2, 5)                             | 4 (3, 5)             | 0.102   | 4 (4, 5)                             | 4 (3, 5)             | 0.670   |

<sup>1</sup>N ranged between 57-62; <sup>2</sup>N for 3-4 sessions was 10; <sup>3</sup>N for 5-6 sessions ranged between 30-32; <sup>4</sup>Likert scale values from 1 to 5: 1=never; 2=rarely; 3=sometimes; 4=usually; 5=always; <sup>5</sup>P25, 25th percentile, P75, 75th percentile; \*P-value significance accepted at p<0.05 using post hoc Wilcoxon Signed-Rank Test.

*Supplementary Table 2. Confidence ratings for preparation and cooking practices at baseline and post intervention stratified by attendance*

| Food Preparation Practices      | All participants <sup>1</sup>                  |                      |         | Attendance 3-4 sessions <sup>2</sup> |                      |         | Attendance 5-6 sessions <sup>3</sup> |                      |          |
|---------------------------------|------------------------------------------------|----------------------|---------|--------------------------------------|----------------------|---------|--------------------------------------|----------------------|----------|
|                                 | Pre                                            | Post                 | P value | Pre                                  | Post                 | P value | Pre                                  | Post                 | P value* |
|                                 | Median <sup>4</sup><br>(P25, P75) <sup>5</sup> | Median<br>(P25, P75) |         | Median<br>(P25, P75)                 | Median<br>(P25, P75) |         | Median<br>(P25, P75)                 | Median<br>(P25, P75) |          |
| Cooking using raw ingredients   | 4 ( 3, 6)                                      | 6 (3, 7)             | 0.003*  | 3.5 (2.8, 2.3)                       | 4.5 (3, 6.3)         | 0.139   | 5 (3.3, 7)                           | 6 (4.3, 7)           | 0.009*   |
| Following a simple recipe       | 5 (4, 6)                                       | 6 (4, 7)             | 0.003*  | 4 (1.8, 5.5)                         | 5.5 (3.5, 7)         | <0.05*  | 5.5 (4, 7)                           | 7 (5.3, 7)           | <0.05*   |
| Planning meals before shopping  | 4 (2, 5)                                       | 5 (3, 6)             | <0.05*  | 3 (1.8, .3)                          | 4 (3, 6.5)           | <0.05*  | 4 (3, 6)                             | 6 (4, 6.8)           | <0.05*   |
| Shopping on a budget            | 4 (3, 6)                                       | 5 (4, 6)             | 0.044*  | 4.5 (4, 6.3)                         | 4.5 (3, 5.3)         | 0.739   | 4.5 (3, 7)                           | 6 (5, 7)             | <0.05*   |
| Shopping for healthier food     | 4 (3, 6)                                       | 5 (4, 6)             | 0.007*  | 4 (2.8, 6)                           | 4.5 (4, 5)           | 0.365   | 4.5 (3.3, 6.8)                       | 6 (4, 6.8)           | 0.059    |
| Cooking new foods               | 3 (2, 5)                                       | 5 (3, 6)             | <0.05*  | 2 (1, 3.3)                           | 3 (2, 4.3)           | 0.014*  | 4 (2, 5)                             | 6 (5, 7)             | 0.001*   |
| Cooking healthier foods         | 4 (3, 5)                                       | 5 (3, 6)             | 0.001*  | 3.5 (2.8, 5)                         | 4 (2.8, 5)           | 0.680   | 4 (3.3, 5)                           | 6 (5, 7)             | 0.001*   |
| Storing food safely             | 5 (4, 7)                                       | 6 (4, 7)             | 0.002*  | 4 (4, 7)                             | 6 (4.8, 7)           | 0.156   | 5 (4, 7)                             | 6 (5.3, 7)           | 0.002*   |
| Using leftovers for other meals | 4 2, 5)                                        | 5 (3, 6)             | 0.002*  | 3 (2, 5.5)                           | 4 (2, 5.3)           | 0.416   | 4 (2, 5)                             | 5 (3, 7)             | 0.007*   |
| Cooking whole raw chicken       | 5 (2, 7)                                       | 6 (3, 7)             | 0.021*  | 5 (2, 7)                             | 6 (2, 7)             | 0.610   | 5 (2, 7)                             | 7 (3.3, 7)           | 0.001*   |
| Reading food labels             | 4 (2, 6)                                       | 5 (4, 7)             | 0.000*  | 2.5 (2, 4)                           | 6 (2, 7)             | 0.027*  | 5 (3, 6)                             | 6 (5, 7)             | 0.001*   |
| Food hygiene                    | 6 (5, 7)                                       | 6 (5, 7)             | 0.624   | 6.5 (4.8, 7)                         | 6 (1.8, 7)           | 0.497   | 6 (5, 7)                             | 7 (5, 7)             | 0.744    |

<sup>1</sup>N ranged between 57-62; <sup>2</sup>N for 3-4 sessions was 10, <sup>3</sup>N for 5-6 sessions ranged between 30-32; <sup>4</sup>Liker scale values from 1 to 7: 1=not at all confident, 7=very confident. <sup>5</sup>P25, 25th percentile, P75, 75th percentile; \*P-value significance accepted at p<0.05 using post hoc Wilcoxon Signed-Rank Text.
